# Supplementary material for: Reliability of a wearable wireless patch for continuous remote monitoring of vital signs in patients recovering from major surgery: a clinical validation study from the TRaCINg trial
Source: PubMed Central journal article supplement (PMC6701670; doi:10.1136/bmjopen-2019-031150), 2019-08-15
Supplement: bmjopen-2019-031150supp001.pdf [file bmjopen-2019-031150supp001.pdf]

## Supplementary Materials

## Sensitivity analysis

| Window size | HR (n = 1135) | RR (n = 1134) | Temp (n = 1132) |
|-------------|---------------|---------------|-----------------|
| ±2 mins     | 306           | 630           | 212             |
| ±5 mins     | 249           | 392           | 174             |
| ±10 mins    | 232           | 286           | 147             |

Missing pairs of data (i.e. no data within n minute window of nurse observation)

| Window size | HR (bias, LoA)           | RR (bias, LoA)        | Temp (bias, LoA)     |
|-------------|--------------------------|-----------------------|----------------------|
| ±2 mins     | - 2.74 (-25.39, 19.91)   | 3.07 (-9.05 to 15.20) | 0.82 (-1.21 to 2.86) |
| ±5 mins     | -2.35 (-24.68 to 19.98)  | 3.13 (-8.64 to 14.90) | 0.82 (-1.23 to 2.87) |
| ±10 mins    | - 1.85 (-23.92 to 20.22) | 2.93 (-8.19 to 14.05) | 0.82 (-1.13 to 2.78) |

Bland-Altman bias and 95% limits of agreement for ±2, ±5, ±10 window lengths of continuous vital sign patch data
